# Supplementary material for: Iron impregnated SBA-15, a mild and efficient catalyst for the catalytic hydride transfer reduction of aromatic nitro compounds
Source: Royal Society of Chemistry journal article supplement (doi:10.1039/c3ra46303f), 2014-01-01
Supplement: c3ra46303f1.pdf [file c3ra46303f1.pdf]

### Supplementary Information

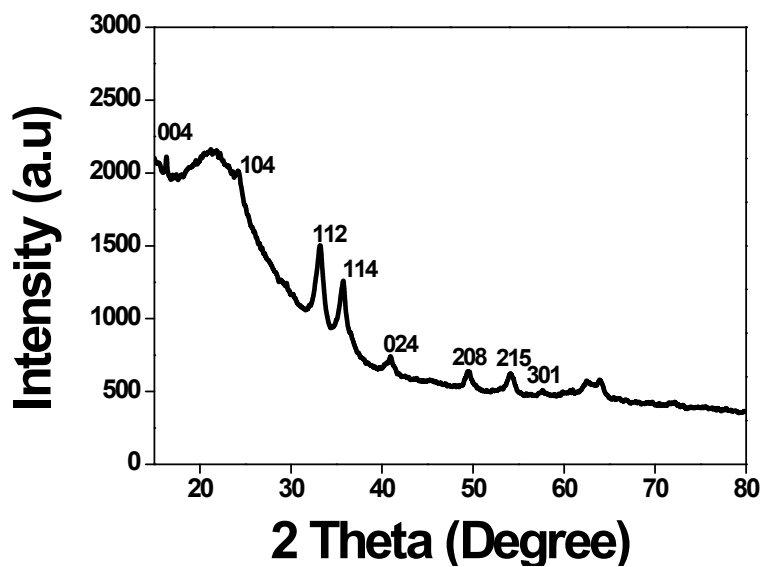

SI 1 Wide angle XRD pattern of Fe-SBA-15

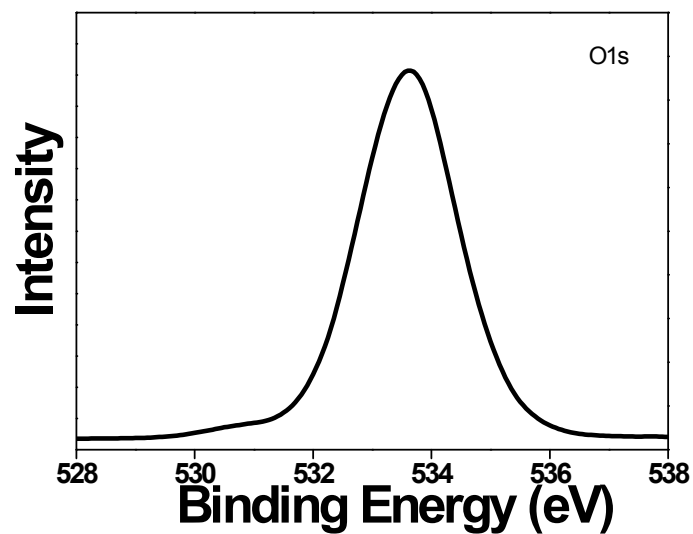

SI 2 XPS spectra of O1s

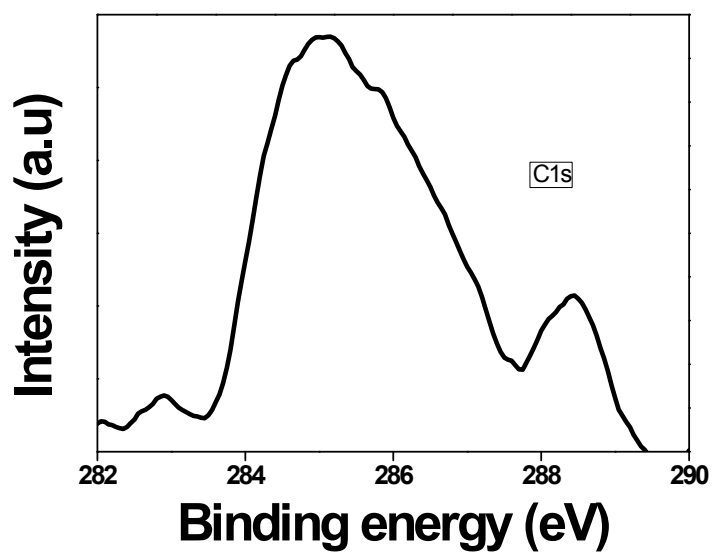

SI 3 XPS spectra of C1s

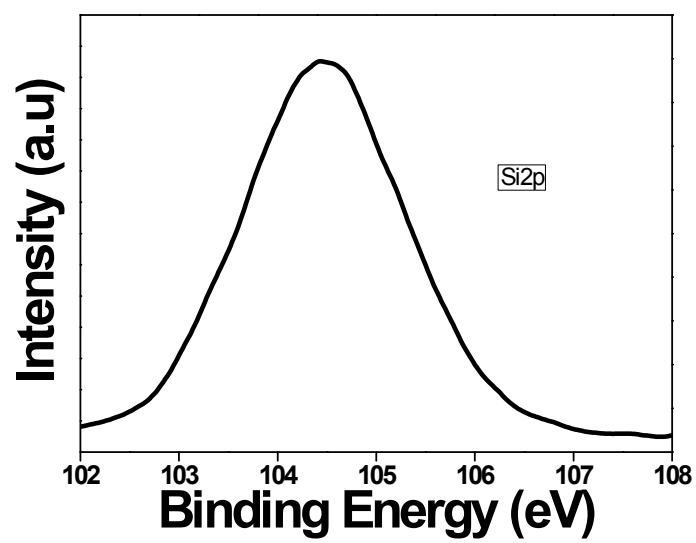

SI 4 XPS spectra of Si2p

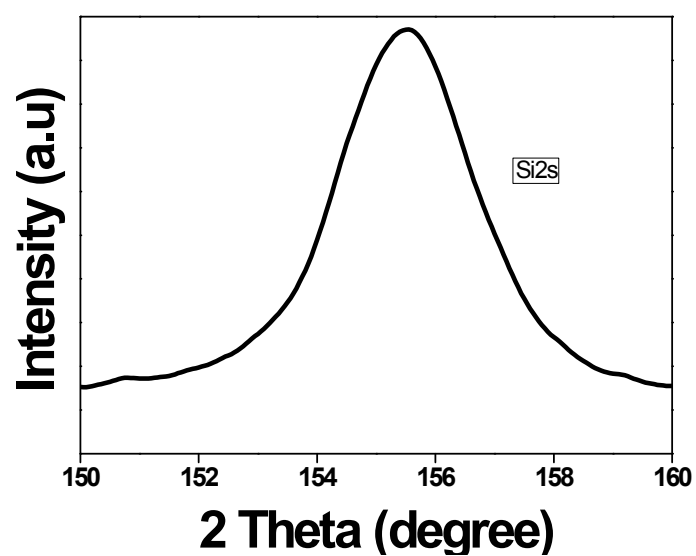

SI 5 XPS spectra of Si2s

| Element | Weight% | Atomic% |
|---------|---------|---------|
| O K     | 51.35   | 69.26   |
| Si K    | 31.29   | 24.04   |
| Fe K    | 17.36   | 6.71    |
| Totals  | 100.00  |         |

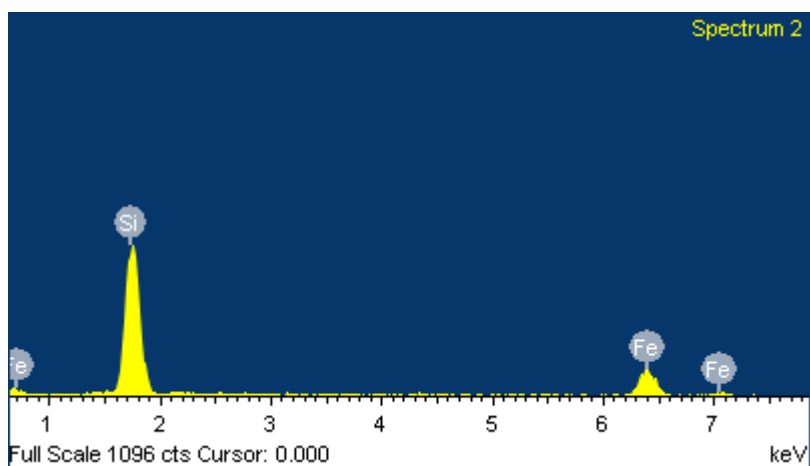

SI 6 EDAX pattern of Fe-SBA-15
